RESEARCH ARTICLE

# A MutS $\beta$ -Dependent Contribution of MutS $\alpha$ to Repeat Expansions in Fragile X Premutation Mice?

Xiao-Nan Zhao<sup>1‡</sup>, Rachel Lokanga<sup>1,2‡</sup>, Kimaada Allette<sup>1<sup>ma</sup></sup>, Inbal Gazy<sup>1</sup>, Di Wu<sup>3<sup>mb</sup></sup>, Karen Usdin<sup>1\*</sup>

**1** Section on Gene Structure and Disease, Laboratory of Cell and Molecular Biology, National Institute of Diabetes, Digestive and Kidney Diseases, National Institutes of Health, Bethesda, Maryland, United States of America, **2** Division of Medical Biochemistry, University of Cape Town Medical School, Cape Town, South Africa, **3** Section on Physical Biochemistry, Laboratory of Biochemistry and Genetics, National Institute of Diabetes, Digestive and Kidney Diseases, National Institutes of Health, Bethesda, Maryland, United States of America

<sup>ma</sup> Current address: Icahn Institute and Department of Genetics & Genomic Sciences, Icahn School of Medicine at Mount Sinai, New York, New York, United States of America

<sup>mb</sup> Current address: Institute of Molecular Biophysics, Florida State University, Tallahassee, Florida, United States of America

<sup>‡</sup> These authors contributed equally to this work and thus should be considered co-first authors.

\* [ku@helix.nih.gov](mailto:ku@helix.nih.gov)

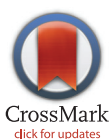

 OPEN ACCESS

**Citation:** Zhao X-N, Lokanga R, Allette K, Gazy I, Wu D, Usdin K (2016) A MutS $\beta$ -Dependent Contribution of MutS $\alpha$  to Repeat Expansions in Fragile X Premutation Mice? *PLoS Genet* 12(7): e1006190. doi:10.1371/journal.pgen.1006190

**Editor:** Christopher E. Pearson, The Hospital for Sick Children and University of Toronto, CANADA

**Received:** September 28, 2015

**Accepted:** June 22, 2016

**Published:** July 18, 2016

**Copyright:** This is an open access article, free of all copyright, and may be freely reproduced, distributed, transmitted, modified, built upon, or otherwise used by anyone for any lawful purpose. The work is made available under the [Creative Commons CC0](https://creativecommons.org/licenses/by/4.0/) public domain dedication.

**Data Availability Statement:** All relevant data are within the paper and its Supporting Information files.

**Funding:** The work described in this manuscript was funded by a grant from the Intramural Program of the National Institute of Diabetes, Digestive and Kidney Diseases to KU (Grant number DK057808-07). The funders had no role in study design, data collection and analysis, decision to publish, or preparation of the manuscript.

**Competing Interests:** The authors have declared that no competing interests exist.

## Abstract

The fragile X-related disorders result from expansion of a CCG/CCG microsatellite in the 5' UTR of the *FMR1* gene. We have previously demonstrated that the MSH2/MSH3 complex, MutS $\beta$ , that is important for mismatch repair, is essential for almost all expansions in a mouse model of these disorders. Here we show that the MSH2/MSH6 complex, MutS $\alpha$  also contributes to the production of both germ line and somatic expansions as evidenced by the reduction in the number of expansions observed in *Msh6*<sup>-/-</sup> mice. This effect is not mediated via an indirect effect of the loss of MSH6 on the level of MSH3. However, since MutS $\beta$  is required for 98% of germ line expansions and almost all somatic ones, MutS $\alpha$  is apparently not able to efficiently substitute for MutS $\beta$  in the expansion process. Using purified human proteins we demonstrate that MutS $\alpha$ , like MutS $\beta$ , binds to substrates with loop-outs of the repeats and increases the thermal stability of the structures that they form. We also show that MutS $\alpha$  facilitates binding of MutS $\beta$  to these loop-outs. These data suggest possible models for the contribution of MutS $\alpha$  to repeat expansion. In addition, we show that unlike MutS $\beta$ , MutS $\alpha$  may also act to protect against repeat contractions in the *Fmr1* gene.

## Author Summary

The repeat expansion diseases are a group of human genetic disorders that are caused by expansion of a specific microsatellite in a single affected gene. How this expansion occurs is unknown, but previous work in various models for different diseases in the group, including the fragile X-related disorders (FXDs), has implicated the mismatch repair

complex MutS $\beta$  in the process. With the exception of somatic expansion in Friedreich ataxia, MutS $\alpha$  has not been reported to contribute to generation of expansions in other disease models. Here we show that MutS $\alpha$  does in fact play a role in both germ line and somatic expansions in a mouse model of the FXDs since the expansion frequency is significantly reduced in *Msh6*<sup>-/-</sup> mice. However, since we have previously shown that loss of MutS $\beta$  eliminates almost all expansions, MutS $\alpha$  is apparently not able to fully substitute for MutS $\beta$  in the expansion process. We also show here that MutS $\alpha$  increases the stability of the structures formed by the fragile X repeats that are thought to be the substrates for expansion and promotes binding of MutS $\beta$  to the repeats. This, together with our genetic data, suggests possible models for how MutS $\alpha$  and MutS $\beta$ , could co-operate to generate repeat expansions in the FXDs.

## Introduction

The fragile X (FX)-related disorders (FXDs) are repeat expansion diseases that result from an increase in the length of a CGG/CCG-repeat tract in the 5' UTR of the *FMRI* gene (reviewed in [1]). This expansion occurs from an unstable premutation (PM) allele that contains 55–200 repeats. The repeat is prone to expansion in germ line and somatic cells in humans and in a FXD mouse model with a targeted insertion of ~130 FX-repeats [2–4]. The molecular basis of this instability is not known. Individual strands of the FX repeat form hairpins and other atypical structures some of which may be folded and include mismatches [5–12] and current thinking is that these structures are the substrates for the expansion pathway [13].

We have previously shown that a number of different pathways that affect repeat instability are active in a mouse model of the FXDs, one that gives rise to expansions, one that results in the error-free repair of the expansion substrate and perhaps two different contraction pathways [14, 15]. We have also shown that the mismatch repair (MMR) complex MutS $\beta$ , a heterodimer of MSH2 and MSH3, is required for 98% of germ line and all somatic expansions in the FXD mouse [14]. This is consistent with what has been seen in some, but not all mouse models of other repeat expansion diseases [16–18]. MutS $\alpha$ , the other MSH2-containing complex present in mammals, has been shown to either have no effect or to protect against repeat instability in various mouse models [16, 17, 19]. For example, in a mouse model for myotonic dystrophy type 1 (DM1), MutS $\alpha$  protects against somatic expansions [19] and in a mouse model for Friedreich ataxia (FRDA) MutS $\alpha$  protects against both germ line expansions and contractions [17]. However, FRDA is also unique amongst the repeat expansion diseases studied thus far in that MutS $\alpha$  has also been shown to be involved in generating somatic expansions in the mouse model and in patient-derived induced pluripotent stem cells [20]. Whether or not this involvement of MutS $\alpha$  reflects some unique property of the GAA/TTC-repeats is not known. Furthermore, why MutS $\alpha$  protects against, rather than promotes, germ line expansions is also an open question [17].

As part of an effort to better understand the mechanisms of repeat instability in the FXD mouse model, we examined the somatic and intergenerational instability of the FX repeat in mice lacking MSH6, the MSH2-binding protein in the MutS $\alpha$  heterodimer. These data, together with our biochemical studies on the binding of these complexes to CGG- and CCG-repeats have interesting implications for the mechanism of repeat instability in the FXDs.

## Results

### Loss of MSH6 reduces the extent of somatic expansions.

Our previous work indicates that in the FXD mouse model expansion, contraction and error-free pathways co-exist in germ line cells [4]. This can complicate the interpretation of

intergenerational transmission data since a decrease in expansions can result either because the expansion pathway has become less efficient or because a pathway that protects against contractions has been impaired, or some combination of both. However, the interpretation of somatic instability data is simpler since all evidence to date suggests that the contraction pathway is not active in adult somatic cells in this mouse model [3, 4, 15].

Since somatic expansion is much more extensive in males than in females in the FXD mouse model [21], we examined the effect of the loss of MSH6 on expansion in different organs of male mice that were 6 months old. This time point was chosen since *Msh6*<sup>-/-</sup> male mice rarely survive beyond this age. However, since somatic expansion is clearly discernable in *Msh6*<sup>+/+</sup> males at this age, any effect of the loss of MSH6 can be readily detected. To examine the effect of the loss of MSH6 on somatic instability in male mice we carried out PCR across the repeat and then resolved the PCR products by high-resolution capillary electrophoresis. Analysis of the PCR products produced from somatic tissue of *Msh6*<sup>+/+</sup> animals at weaning at 3 weeks of age (tail 1) or in organs that do not show somatic expansion, like heart, typically reveal a Gaussian distribution of PCR products with relatively little deviation of these products from the mean (Fig 1A).

These PCR profiles are indistinguishable from those obtained from samples taken at birth [3]. Some of these products represent strand-slippage products that are generated when

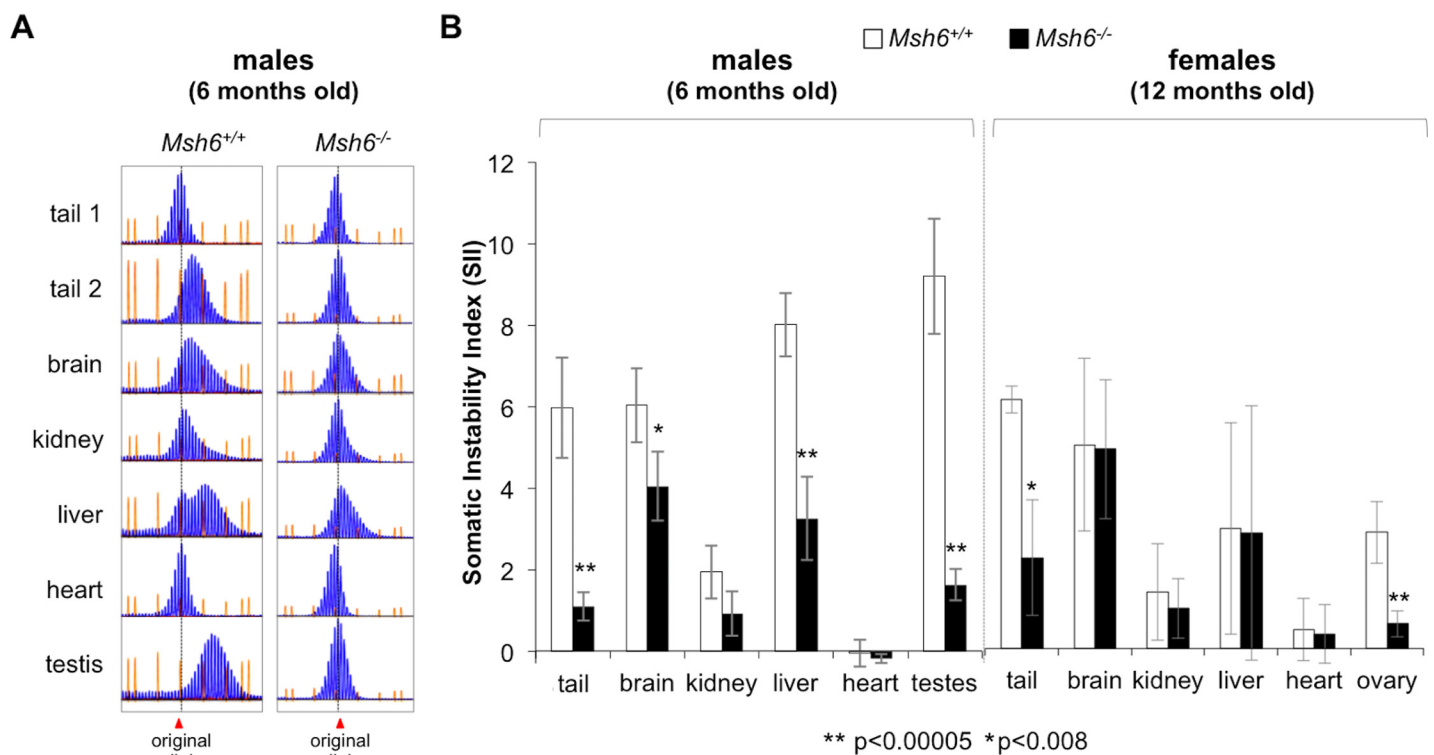

**Fig 1. Loss of MSH6 reduces somatic expansions in both males and females.** A) Representative examples of the GeneMapper profiles for the PM allele in different organs of 6 month old *Msh6*<sup>+/+</sup> and *Msh6*<sup>-/-</sup> males. Tail 1 refers to the tail DNA at 3 weeks of age, while tail 2 refers to the tail sample taken at 6 months of age. B) The SII for the organs of six 6-month old *Msh6*<sup>-/-</sup> males and six *Msh6*<sup>+/+</sup> littermates and three 12 month old *Msh6*<sup>-/-</sup> females and four *Msh6*<sup>+/+</sup> littermates was determined and the average SII for each organ plotted. The initial repeat number in these mice was ~160. The negative value for the heart in animals of each genotype and for the remaining organs in *Msh6*<sup>-/-</sup> mice reflects the strand-slippage or stutter products that are typically seen when large repeat tracts are amplified rather than contraction events. Note that despite the fact that the females are twice as old as the males, the SIIs for all organs in females were either similar to or lower than they were in males. The error bars represent standard deviations.

doi:10.1371/journal.pgen.1006190.g001

amplifying through long repeat tracts. In particular, the PCR products smaller than the major allele that do not change with genotype, age or tissue, fall into this category. We then used these PCR profiles to determine the somatic instability index (SII), a quantitative measure of the extent of repeat expansion [22]. In *MSH6*<sup>+/+</sup> males the SII for heart was -0.1 (Fig 1B). This negative number is not evidence of contractions since the SII in heart does not change with age and the PCR profile seen in old animals corresponds to the original allele size determined at birth ([3] and Fig 1A). The negative value likely reflects contribution of the products of strand-slippage to the SII. In organs other than the heart, the SII was positive with the lowest SII being seen in kidney and the highest in liver and testes as we had previously observed [3].

The loss of MSH6 was associated with a significant reduction in the SII in many organs of male mice (Fig 1B). The organs most affected are those with the highest level of expansion in *Msh6*<sup>+/+</sup> animals, namely, the tail, brain, liver and testis. However, the distribution of products smaller than the major allele are similar in all tissues including the tail sample taken at weaning and the heart, an organ that shows little, if any instability (Fig 1A). We also did not see evidence of somatic contractions in *Msh2*<sup>-/-</sup> mice that lack both MutS $\alpha$  and MutS $\beta$  [23]. Thus the failure to see evidence of contractions in *Msh6*<sup>-/-</sup> mice is not the result of an offsetting effect of MutS $\beta$ -mediated expansions. We can therefore conclude that the reduced SII in *Msh6*<sup>-/-</sup> mice is not the result of contractions that have now become apparent as a result of the loss of MSH6. Rather the reduction must reflect either a direct or indirect role of MSH6, and thus MutS $\alpha$ , in generating somatic expansions.

Female *Msh6*<sup>+/+</sup> mice show less somatic expansion than males [21]. This makes it difficult to see significant effects of the loss of MSH6 in young animals. We thus confined our examination of somatic instability in *Msh6*<sup>-/-</sup> females to the few that survived to 12 months of age. Note that despite the females being twice as old as the males, the SII in *Msh6*<sup>+/+</sup> females was still lower than it was in most of the corresponding organs of 6 month old males, consistent with reduced somatic instability in females (Fig 1B). Nonetheless, a role for MSH6 in generating somatic expansions was apparent in *Msh6*<sup>-/-</sup> females albeit only in tail and ovary (Fig 1B). Thus, the loss of MSH6, like the loss of MSH3, reduces the extent of somatic expansion. However, while somatic expansions are completely eliminated in *Msh3*<sup>-/-</sup> males and females on a similar genetic background [14], some expansion is still evident in *Msh6*<sup>-/-</sup> mice of both sexes.

### Loss of Msh6 also significantly reduces the frequency of germ line expansions

We hypothesized that the loss of MSH6 would also affect germ line expansions with loss of two copies of the gene having a larger effect than the loss of one copy. We thus examined the transmission of the PM allele on intergenerational transfer from *Msh6*<sup>+/+</sup>, *Msh6*<sup>+/-</sup> and *Msh6*<sup>-/-</sup> parents. The Jonckheere-Terpstra test for ordered alternatives showed that there was a statistically significant trend towards fewer expansions with decreasing *Msh6* gene dosage ( $p < 0.001$  for both paternal and maternal transmission). Pairwise comparisons demonstrated that while the expansion frequencies in the offspring of *Msh6*<sup>+/-</sup> parents was not significantly different from the expansion frequency in the offspring of *Msh6*<sup>+/+</sup> parents, the progeny of *Msh6*<sup>-/-</sup> males and females had significantly fewer expansions than the progeny of either the *Msh6*<sup>+/+</sup> (Fisher's exact test;  $p = 0.0003$  for paternal and  $p < 0.0001$  for maternal transmission respectively; Fig 2) or the *Msh6*<sup>+/-</sup> parents (Fisher's exact test;  $p = 0.008$  paternal and  $p < 0.0001$  for maternal transmission respectively; Fig 2).

There was also a significant difference in the distribution of the transmitted alleles for both maternal and paternal transmissions (Mann-Whitney *U* test;  $p < 0.0001$  for both males and females). There is no evidence to date to suggest that somatic and germ line expansions occur by different mechanisms in the FXD mouse. Thus the simplest interpretation of our data is that the decline in germ line expansions seen in *Msh6*<sup>-/-</sup> animals reflects a contribution of

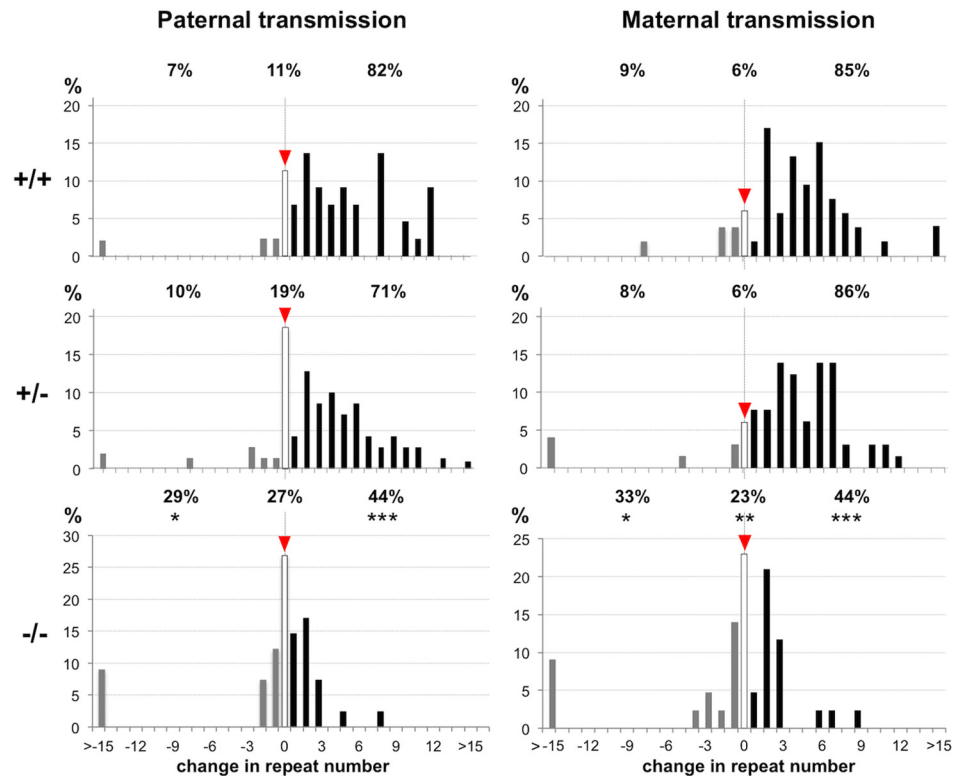

**Fig 2. Loss of MSH6 reduces the frequency of paternally and maternally transmitted expansions.** The % of alleles with the indicated number of repeats added or lost seen on transmission of a PM allele with ~160 repeats from *Msh6*<sup>+/+</sup>, *Msh6*<sup>+/-</sup> and *Msh6*<sup>-/-</sup> parents. A total of 44 *Msh6*<sup>+/+</sup>, 70 *Msh6*<sup>+/-</sup> and 41 *Msh6*<sup>-/-</sup> paternal transmissions and 53 *Msh6*<sup>+/+</sup>, 65 *Msh6*<sup>+/-</sup> and 43 *Msh6*<sup>-/-</sup> maternal transmissions were examined. Differences in frequency of expansions, contractions and unchanged alleles were compared for each pair of genotypes using Fisher's exact test in which each allele class was considered in relation to the sum of the other two allele size classes. The allele classes that are significantly different from *Msh6*<sup>+/+</sup> animals are marked with asterisks (\*, p<0.05; \*\*, p<0.01; \*\*\*, p<0.001); frequencies were also compared across all 3 genotypes with exact Jonckheere-Terpstra tests (p<0.001 for each sex).

doi:10.1371/journal.pgen.1006190.g002

MutS $\alpha$  to the germ line expansion process. This would be above and beyond the 2% of expansions that are MSH2-dependent, but MSH3-independent that we previously attributed to MutS $\alpha$  [14]. However, in contrast to the 80:20 ratio of unchanged to contracted alleles seen in *Msh3*<sup>-/-</sup> males [14], in *Msh6*<sup>-/-</sup> males the ratio was 50:50 (27% vs 29% of the total alleles). The ratio of unchanged to contracted alleles in *Msh2*<sup>-/-</sup> mice is intermediate between the two (60:40) consistent with the combined contribution of MutS $\beta$  and MutS $\alpha$  complexes to the overall distribution of residual alleles [23]. The decline in the proportion of unchanged alleles in *Msh2*<sup>-/-</sup> and *Msh6*<sup>-/-</sup> animals relative to *Msh3*<sup>-/-</sup> mice may reflect an additional role for MutS $\alpha$  in protecting against contractions which occur in the germ line, but not somatic cells. Thus the decline in expansions seen on intergenerational transmission in *Msh6*<sup>-/-</sup> mice may represent some combination of the reduced efficacy of the expansion pathway together with the reduced efficacy of the pathway that protects against contractions.

### Loss of MSH6 does not eliminate large contractions

We have previously shown that loss of MSH3 results in a change in the distribution of contraction sizes that are seen on intergenerational transmission [14]. Specifically while animals

wildtype with respect to mismatch repair show a bimodal distribution of repeat sizes with the first modal class having lost 1–2 repeats and a second modal class having lost >7 repeats, *Msh3*<sup>-/-</sup> mice show a significant loss of alleles falling into the second modal class. Most notably in *Msh3*<sup>-/-</sup> males all contractions involved the loss of just a single repeat. This would be consistent with a role for MutS $\beta$  in generating larger contractions.

To assess the contribution of MutS $\alpha$  to contractions we examined the distribution of contracted alleles in *Msh6*<sup>-/-</sup> animals. *Msh6*<sup>-/-</sup> males die young making it difficult to collect enough data on the contraction sizes of paternally transmitted alleles. Therefore we analyzed the effect of the loss of MSH6 on the distribution of contraction sizes by doing small pool PCR on sperm DNA isolated from 2 month old *Msh6*<sup>-/-</sup> males (Fig 3A). The expansion frequency in *Msh6*<sup>+/+</sup> sperm was generally lower than that observed in the live born progeny of *Msh6*<sup>+/+</sup> animals. This could reflect the difference in the ages of the sperm donors (2 months) versus the fathers (2–6 months), since there is a progressive increase in the proportion of expanded alleles with

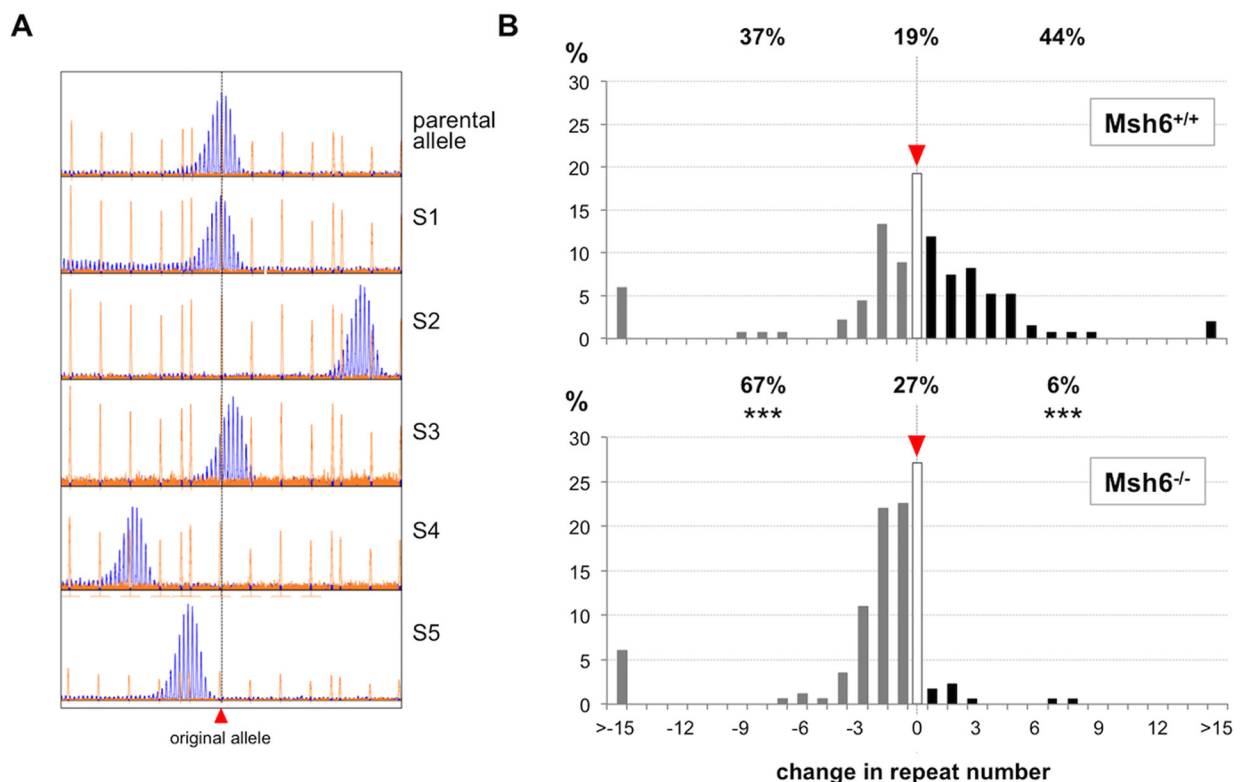

**Fig 3. Loss of MSH6 reduces the frequency of expansions but does not significantly reduce the frequency of large contractions in the sperm of *Msh6*<sup>-/-</sup> males.** Small pool PCR was carried out on the sperm of 2-month old males as described in the Materials and Methods. A) Representative GeneMapper profiles for sperm samples analyzed by small-pool PCR showing the original paternal allele and 5 alleles, labeled S1-S5, found in sperm. B) The % of alleles with the loss or gain of different repeat numbers seen in the sperm of *Msh6*<sup>+/+</sup> and *Msh6*<sup>-/-</sup> mice. A total of 135 and 173 alleles were examined in the sperm of *Msh6*<sup>+/+</sup> and *Msh6*<sup>-/-</sup> mice respectively. The proportion of contractions, expansions and alleles that are the same size as the parental allele are indicated above each graph. Differences between these allele classes were compared for each pair of genotypes using Fisher's exact test in which each allele class was considered in relation to the sum of the other two allele size classes. The allele classes that are significantly different from *Msh6*<sup>+/+</sup> animals are marked with asterisks ( $p < 0.0001$ ). Note that the proportion of the different allele classes differs from the data shown in Fig 2. This difference is likely due to the differences in the ages of the animals in the two data sets since in males the number of expansions increases with age, although it is also possible that this reflects, in part, the contribution of other cell types that might be present in the sperm sample. Note that, in contrast to what is seen in *Msh3*<sup>-/-</sup> animals, the distributions of the contracted alleles for both genotypes significantly deviated from unimodality (Hartigan's dip test:  $p < 2.2e-16$ ).

doi:10.1371/journal.pgen.1006190.g003

age [4]. A contribution of low level of contamination of the sperm sample with less expansion-prone somatic cells also cannot be completely excluded. However, the expansion frequency was also lower in the sperm of *Msh6*<sup>-/-</sup> mice than in the progeny of *Msh6*<sup>-/-</sup> males. Thus, as expected, there were fewer expansions and more contractions than in the sperm of *Msh6*<sup>+/+</sup> males of the same age (Fig 3B, Fisher's exact test;  $p < 0.0001$ ). In addition, the distribution of alleles in *Msh6*<sup>-/-</sup> and *Msh6*<sup>+/+</sup> gametes was significantly different by the Mann-Whitney *U* test ( $p < 0.0001$ ). This is generally consistent with the data derived from analysis of the progeny of *Msh6*<sup>-/-</sup> males (Fig 2).

In any event, in contrast to what is seen in *Msh3*<sup>-/-</sup> animals, the distribution of contractions in *Msh6*<sup>-/-</sup> sperm was similar to that seen in *Msh6*<sup>+/+</sup> sperm (Mann-Whitney *U* test;  $p = 0.14$ ). Our data thus suggest that MSH6, and therefore MutS $\alpha$  does not severely impact the distribution of contraction sizes as does MutS $\beta$  [14].

### Loss of MSH6 does not lead to decreased levels of MSH3

It has been suggested that MSH2 partitions between available pools of MSH3 and MSH6 and thus that the loss of MSH6 should thus not lead to a decrease in MutS $\beta$  [24–26]. To verify this we compared the levels of each of the three proteins in various organs of *Msh2*<sup>-/-</sup>, *Msh3*<sup>-/-</sup>, *Msh6*<sup>-/-</sup> mice and mice WT for all three proteins. As can be seen in Fig 4, the absence of MSH2 led to a complete loss of bands with the predicted mobility of MSH3 and MSH6, consistent with previous data demonstrating that the formation of MutS $\alpha$  and MutS $\beta$  complexes protects their subunits from degradation [24, 26, 27]. The loss of MSH6 resulted in a much larger decrease in the levels of MSH2 than did the loss of MSH3 in all organs tested. However, as can

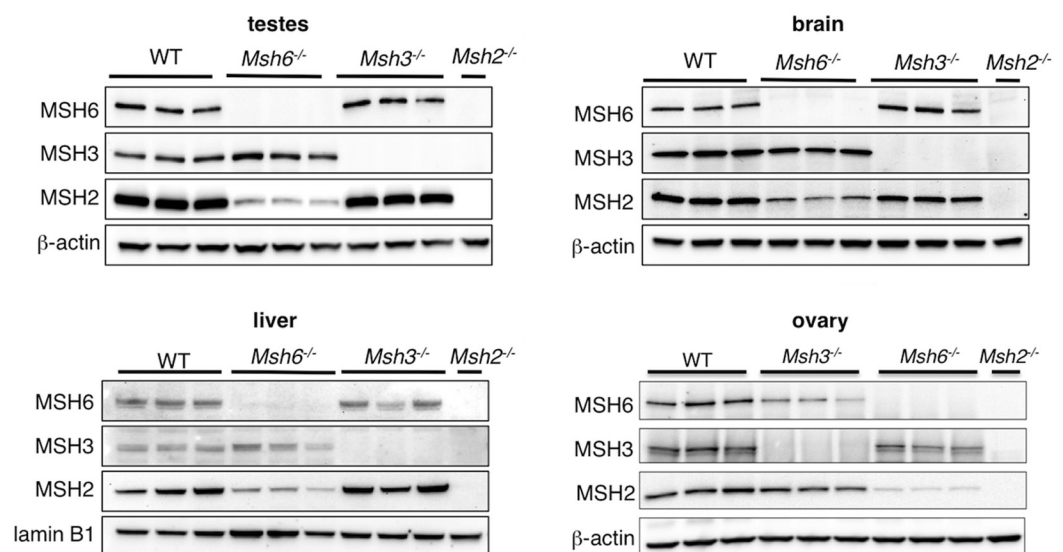

**Fig 4. The loss of MSH6 does not affect the levels of MSH3 in brain and testes.** Equivalent amounts of total protein from brain, testes and ovary and nuclear extracts from liver of three 6-month old WT, *Msh3*<sup>-/-</sup> and *Msh6*<sup>-/-</sup> and *Msh2*<sup>-/-</sup> mice were subjected to electrophoresis and western blotting using the MSH2, MSH3 and MSH6 antibodies described in the Materials and Methods. Nuclear extracts of liver were used to enrich for the MMR proteins that are particularly low in this organ, and to remove a non-specific protein that cross-reacts with the MSH6 antibody. Note that the gel used for nuclear extracts (4–12% Tris-Bis) was different from the gels used to resolve total protein extracts (3–8% Tris-acetate). A representative example of a full blot showing the binding of antibodies to MSH2, MSH3, MSH6 is shown in S1 Fig. Note that in ovary and liver more than one MSH3-species was seen in both WT and *Msh6*<sup>-/-</sup> animals. This most likely reflects proteolytic degradation of MSH3 during preparation of the protein extracts.

doi:10.1371/journal.pgen.1006190.g004

be seen in Fig 4, the levels of MSH3 are comparable in the brain and testes of *Msh6*<sup>+/+</sup> and *Msh6*<sup>-/-</sup> mice and after normalizing to  $\beta$ -actin, no significant difference in the levels of MSH3 were detected. Two MSH3 bands were seen the liver and ovary of *Msh6*<sup>+/+</sup> and *Msh6*<sup>-/-</sup> animals that were absent in extracts from *Msh3*<sup>-/-</sup> animals. These bands are thus likely to be MSH3-related. A similar pair of bands was seen in mouse spleen extracts using a MSH3 antibody that was directed to a similar region of the protein as the antibody we used [28]. However, in that report, only one band was detected with an antibody that recognizes a very N-terminal epitope. The N-terminal end of MSH3 known to be prone to degradation [29, 30] and it is possible that the smaller of the two bands represents a proteolytic degradation product of MSH3 in which the N-terminus had been lost. Thus, while the original levels of MSH3 in these organs are difficult to determine unequivocally, the data from brain and testes suggests that the effect of the loss of MSH6 on somatic and germ line expansion is not due to an indirect effect on the levels of MSH3, at least in some of the most expansion-prone organs in these animals.

### MutS $\alpha$ binds to and increases the stability of the secondary structures formed by the CCG and CGG loop-outs

We have previously shown that MutS $\beta$  binds to loop-outs formed by CCG- and CGG-repeats [14]. To see whether the same was true of MutS $\alpha$ , we examined the binding of this protein to substrates containing a loop-out of (CCG)<sub>13</sub> or (CGG)<sub>13</sub>. These substrates were modeled on those used previously to examine MutS $\beta$  binding to CAG-repeats [31]. We also included MutS $\beta$  with a deletion of the unstructured N-terminal region of MSH3 [30]. This region of MSH3 is not involved in DNA or nucleotide binding [32] and this MutS $\beta$  complex has the same binding affinities for homoduplexes, tailed substrates and insertion/deletion loops (IDLs) as complexes containing the full length MSH3 protein, as well as the same rate constants and ATPase activities on these substrates [30]. Use of this MSH3 variant has the advantage of producing a DNA:protein complex with a mobility that is distinctly different from that of the DNA:MutS $\alpha$  complex. Both MutS complexes were of equivalent concentration as evidenced by the fact that equivalent amounts of protein contained equivalent amounts of MSH2 (S2 Fig, panel A). There was also no evidence of any degradation of the subunits as evidenced by the single products detectable on western blotting with antibodies to MSH2, MSH3 and MSH6 (S2 Fig, panel A).

As expected MutS $\alpha$  does not bind well to either homoduplex DNA or a loop-out of (CA)<sub>3</sub>, a good substrate for MutS $\beta$ -mediated but not MutS $\alpha$ -mediated repair (S2 Fig, panel B). In contrast, MutS $\beta$  binds effectively to the (CA)<sub>3</sub> loop-out with even low concentrations of protein being able to shift almost all of the substrate. Limited binding of MutS $\beta$  to the homoduplex was also seen (S2 Fig, panel B). This binding is much less extensive than the binding of MutS $\beta$  to the (CA)<sub>3</sub> loop-out as evidence by the fact that no unbound (CA)<sub>3</sub> substrate was seen at a protein concentration of 0.8 nM, while most of the homoduplex remained unbound even at the highest protein concentration tested (20 nM). Binding of MutS $\beta$  to homoduplexes has been previously reported where it has been attributed to end binding [33–35].

MutS $\alpha$  binds to a substrate containing a G•T mismatch (S2 Fig) and to (CCG)<sub>13</sub> and (CGG)<sub>13</sub> loop-outs (Fig 5). It also binds to (CAG)<sub>13</sub> and (CTG)<sub>13</sub> loop-outs (S2 Fig, panel B). However, MutS $\alpha$  binds less well to the repeat substrates than to the G•T mismatch since binding of MutS $\alpha$  to G•T mismatch depletes all of the free probe at the highest protein concentration, while some free probe remains with all the repeat substrates. MutS $\alpha$  binding to the repeat substrates is also less extensive than the binding of MutS $\beta$  (compare lanes 2 and 3 and 12 and 13 of Fig 5).

MutS $\alpha$  stimulates MutS $\beta$  binding to a canonical MMR substrate containing a 2 nucleotide insertion/deletion when present at a high MutS $\alpha$ :MutS $\beta$  ratio [36]. To test whether this was



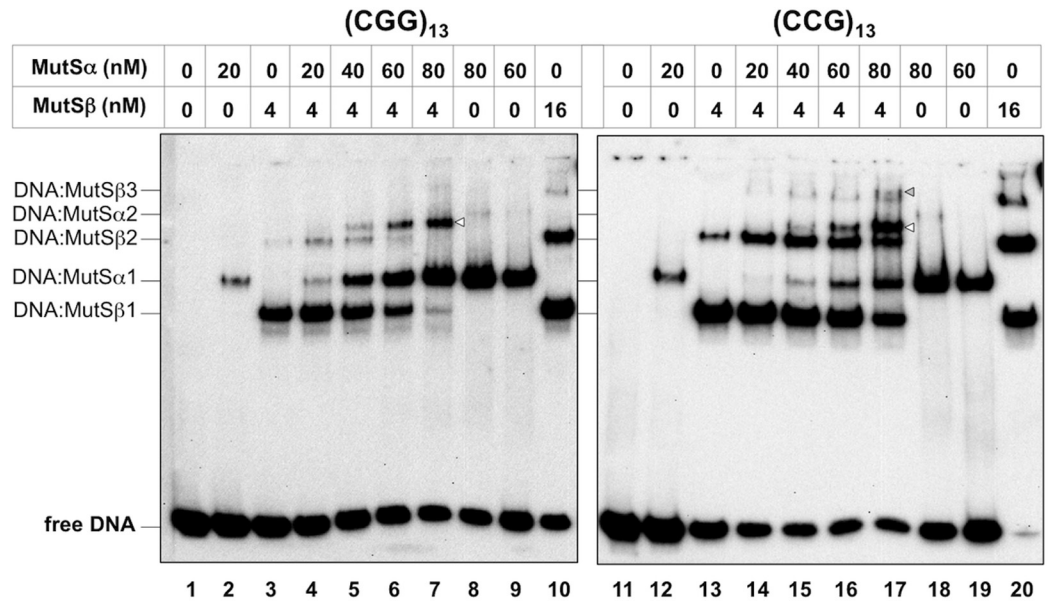

**Fig 5. MutS $\alpha$  binds to both strands of the FX repeat and promotes binding of MutS $\beta$ .** MutS $\alpha$  and/or MutS $\beta$  with the N-terminal truncation of MSH3 were added at the indicated concentrations to reaction mixtures containing the CCG repeat and CGG repeat-containing substrates as described in the Materials and Methods. The DNA and DNA:protein complexes were then resolved by native polyacrylamide gel electrophoresis at 4°C, transferred to nylon membrane and the DNA detected using streptavidin conjugated to horseradish peroxidase (HRP) and a chemiluminescent substrate. The different DNA:MutS complexes are numbered in order of decreasing mobility. The arrowheads indicate novel shifted bands that are not seen in reactions containing either MutS $\alpha$  or MutS $\beta$  alone.

doi:10.1371/journal.pgen.1006190.g005

also true for FX repeat-containing substrates we compared the binding of MutS $\beta$  in the presence and absence of an excess of MutS $\alpha$ . MutS $\beta$  binding to both canonical and repeat containing substrates produced multiple DNA:protein complexes as can be seen in Fig 5 and S2 Fig. Multiple DNA:MutS $\beta$  complexes have been previously reported for both yeast and human proteins binding to canonical MutS $\beta$  substrates [34, 35, 37] as well as (CAG)<sub>13</sub> loop-outs [31]. The different MutS $\beta$  containing products could reflect either multiple MutS $\beta$  molecules binding to a single DNA molecule or to alternative binding modes. MutS $\beta$  binding to (CCG)<sub>13</sub> and (CGG)<sub>13</sub> substrates was increased in the presence of MutS $\alpha$ . This was evidenced most clearly as an increase in the amount of the DNA:MutS $\beta$  complex with the second highest mobility (DNA:MutS $\beta$ 2; compare lanes 3 and 4 and 13 and 14 of Fig 5). This is not likely to be a non-specific effect since the addition of much higher concentrations of BSA do not have the same effect (S2 Fig, panel D). The increase in MutS $\beta$  binding was associated with a decrease in the amount of the MutS $\alpha$ -shifted band. Since the substrate has not been depleted, this decrease is unlikely to reflect competition between MutS $\alpha$  and MutS $\beta$  for binding to the substrate. Rather, it may reflect the incorporation of MutS $\alpha$  into one or more higher molecular weight species. Indeed at higher MutS $\alpha$  concentrations, a new shifted product, indicated by the open arrowheads in Fig 5, is apparent. This product is associated with a decline in the levels of the 2 most rapidly migrating DNA:MutS $\beta$  complexes. It is not seen in the absence of MutS $\beta$  even when very high concentrations of MutS $\alpha$  are used (lanes 8 and 9 and 18 and 19 of Fig 5). It thus likely represents complexes containing both MutS $\alpha$  and MutS $\beta$ . In reactions containing both MutS $\alpha$  and MutS $\beta$  a small amount of a second novel band is also seen with the CCG-substrate (indicated by the grey arrowhead in Fig 5, lane 17). This band may represent the result of binding of

multiple MutS $\beta$  and MutS $\alpha$  complexes to the CCG substrate or complexes in which the binding modes differ from the complex with the faster mobility.

We have previously shown that MutS $\beta$  is able to increase the stability of the CCG-loop-out at physiological temperatures. To assess whether MutS $\alpha$  binding had the same effect, we monitored the thermal denaturation of the oligonucleotide in the presence of BSA or MutS $\alpha$  as previously described [14]. Since the 5' end of the oligonucleotide was labeled with 5-carboxy-X-rhodamine (ROX), a fluorescence donor and the 3' end was labeled with IOWA Black RQ, a fluorescence acceptor, the stability of the hairpins could be assessed in the presence of protein by monitoring the effect of increasing temperature on the fluorescence at 608 nm, the ROX emission wavelength. The oligonucleotide was denatured and cooled under conditions in which the repeats are known to form hairpins [7, 10, 38–42]. The oligonucleotide was then mixed with either BSA or MutS $\alpha$  and the thermal denaturation of the oligonucleotides monitored as previously described [14]. The melting curves obtained for both protein-CCG-repeat mixtures fit a two-state model (S3 Fig). While the best-fit for CCG-repeat melting in the presence of MutS $\alpha$  was within acceptable limits, the data suggest that the process by which the oligonucleotide melts in the presence of MutS $\alpha$  may be more complex than it is either in the presence of BSA or MutS $\beta$  [14]. The thermodynamic parameters derived from analysis of the melting curves are shown in Table 1. As for MutS $\beta$ , the presence of MutS $\alpha$  resulted in higher apparent  $\Delta G$ s at 37°C than is seen in the presence of BSA. This suggests that MutS $\alpha$ , like MutS $\beta$ , increases the stability of the CCG-repeat structure at physiological temperature. However, the significant differences in the enthalpy of melting ( $\Delta H_m$ ) of the oligonucleotide in the presence of MutS $\beta$  ( $52.4 \pm 4.1$  kcal/mol; [14]) and MutS $\alpha$  ( $81.3 \pm 3.0$  kcal/mol) suggest that the consequence of binding of these two complexes differs. This may reflect the very different modes of binding of these complexes to their substrates [30, 34].

## Discussion

We have previously shown that the loss of MSH2 eliminates all germ line and somatic expansions in the FXD mouse and that most of these expansions are MutS $\beta$ -dependent since the loss of MSH3 eliminates almost 98% of germ line expansions and all somatic ones [3, 14]. The remaining 2% of MSH2-dependent germ line expansions are presumably the result of MutS $\alpha$ -dependent events. However, we show here that loss of MSH6, and thus MutS $\alpha$ , reduces both the germ line and the somatic expansion frequency by much more than 2% (Figs 1–3).

A comparison of the relative levels of MSH2 in *Msh3*<sup>-/-</sup> and *Msh6*<sup>-/-</sup> mice showed that the loss of MSH6 resulted in a greater decrease of MSH2 than the loss of MSH3 (Fig 4). The fact that no MSH3 or MSH6 is seen in *Msh2*<sup>-/-</sup> mice (Fig 4) is consistent with previous reports suggesting that the levels of MSH2, MSH3 and MSH6 are interdependent and that there is very little free MSH3 or MSH6 in cells [24, 25]. Thus our data would be consistent with the interpretation that more MSH2 is in a heterodimer with MSH6 than is in a heterodimer with MSH3, *i.e.*, that MutS $\alpha$  is more abundant than MutS $\beta$  in these animals. This finding is consistent with what has been reported for human cells [43, 44] and mice with a mixed C57BL6/129/OLA/FVB background [16], but not with what is seen in FVB mice [28]. While we did not assess the absolute amount of MSH3, a comparison of the relative levels of MSH3 in *Msh6*<sup>+/+</sup>

**Table 1. Comparison of free energy at 37°C and enthalpy changes required to melt the secondary structure formed by CCG-repeats in the presence of BSA and MutS $\alpha$ .**

|                                | $\Delta G$ (37°C) kcal/mol | $\Delta H_m$ kcal/mol |
|--------------------------------|----------------------------|-----------------------|
| <b>BSA</b>                     | 1.88±0.08                  | 28.4±0.9              |
| <b>MutS<math>\alpha</math></b> | 3.67±0.13                  | 81.3±3.0              |

doi:10.1371/journal.pgen.1006190.t001

and *Msh6*<sup>-/-</sup> mice showed that the loss of MSH6 did not result in a detectable decrease in MSH3 levels in expansion-prone organs like brain and testes (Fig 4). Since MSH2 levels were reduced in *Msh6*<sup>-/-</sup> mice it is possible that MSH6 is acting indirectly via decreasing the amount of MSH2 available to form the MutS $\beta$  complex. However, since MSH3 levels are not significantly lower in *Msh6*<sup>-/-</sup> mice and MSH3 is thought to be stable only when in the MutS $\beta$  complex [24, 25], MSH6 may well be playing a different role in the expansion process.

No comparable decrease in expansions is seen in *Msh6*<sup>-/-</sup> mice in models of other repeat expansion diseases where MSH3 has been implicated in the expansion process and where a similar excess of MutS $\alpha$  was seen [16]. In addition, the loss of MSH6 in the same mouse strain or in human cells does not result in reduced repair of typical MutS $\beta$  substrates [45–49]. Thus significant redeployment of MutS $\beta$  to other sites in the genome to compensate for the loss of MutS $\alpha$  is also unlikely to account for the decrease in germ line and somatic expansions seen in *Msh6*<sup>-/-</sup> mice. However, since very few germ line expansions and no somatic ones are detected in mice that lack MutS $\beta$  [14], MutS $\alpha$  is not able to efficiently substitute for MutS $\beta$  in the expansion process despite the relative abundance of MutS $\alpha$  in these animals (Fig 4). A contribution by both MutS $\alpha$  and MutS $\beta$  to repeat expansion is consistent with our previous observations that while MutS $\beta$  levels alone do not correlate well with the levels of somatic instability across 5 different organs, a better correlation is seen when the levels of both MutS $\beta$  and MutS $\alpha$  are considered [3].

Thus, our data suggest that the involvement of MutS $\alpha$  in repeat expansion is not unique to somatic expansion of GAA/TTC-repeats in FRDA, contributing to both germ line and somatic expansion in the FXD mouse. Whether MutS $\alpha$  acts independently of MutS $\beta$  in FRDA unknown. The nature of MutS $\alpha$ 's role in the expansion process in the FXD mouse is also unclear. MutS $\alpha$  may be acting to facilitate MutS $\beta$ -dependent expansion by increasing the stability of the expansion substrates as it does *in vitro* (Table 1), or by protecting the substrates from repair by another mechanism, thus allowing more time for the hairpins or other atypical structures to be processed by MutS $\beta$  to generate expansions. MutS $\alpha$  also promotes binding of MutS $\beta$  to the repeat substrates (Fig 5) in a manner reminiscent of MutS $\alpha$ 's effect on MutS $\beta$  binding to a canonical MutS $\beta$  substrate [36]. This property may reflect yet another way that MutS $\alpha$  could facilitate MutS $\beta$ -mediated repeat expansions.

A role for MutS $\alpha$  in repeat expansion has not been observed in mouse models of CTG/CAG-repeat expansion diseases despite the fact we have shown that MutS $\alpha$  binds to those repeats *in vitro* (S2 Fig). It may be that the effect of the loss of MutS $\alpha$  is only apparent under certain circumstances. For example, it may be that in the FXD mouse model where the expansion frequency is high, the amount of the expansion substrate formed in the germ line exceeds the processing capacity of MutS $\beta$  acting alone. Under these conditions the effect of MutS $\alpha$  would become apparent. When only moderate levels of the expansion substrate are produced, an effect of the loss of MutS $\alpha$  might only be seen in mice with reduced MutS $\beta$  levels since the available MutS $\beta$  in *Msh3*<sup>+/+</sup> animals may be sufficient to process all the expansion substrates without the assistance of MutS $\alpha$ . At the other end of the spectrum when the expansion substrates are present only at very low levels, either one of the MutS complexes may be sufficient to process them. This may explain the perplexing observation that in a mouse model of Huntington disease, loss of MSH2 eliminates germ line expansions but neither the loss of MSH3 nor the loss of MSH6 had any effect on the expansion frequency [18]. This idea would also be consistent with our observation that in the FXD mouse, the loss of MSH6 had more of an effect on somatic expansion in males than in females (Fig 1), since the expansion process is less extensive in females [21] and thus the requirement for MutS proteins may be lower. Thus, the different effects of MutS $\alpha$  and MutS $\beta$  on expansion in different models, in germ line versus somatic cells, or in males and females, may not necessarily reflect differences in the

mechanisms of expansion, but rather differences in the levels of the MutS complexes relative to the substrates that potentially could be processed to generate expansions.

In addition to contributing to the generation of expansions, our data suggest that MutS $\alpha$  may also act to protect against germ line contractions as evidenced by the reduction in the proportion of unchanged alleles in *Msh2*<sup>-/-</sup> [23] and *Msh6*<sup>-/-</sup> animals (Fig 2) relative to *Msh3*<sup>-/-</sup> mice [14]. Protection against germ line contractions by MutS $\alpha$  would be consistent with what has been reported for both the GAA/TTC-mouse model [17] and a CAG/CTG-mouse model [18]. Protection against contractions by MutS $\alpha$  also would be consistent with a typical MMR process albeit one that is triggered by an atypical repair substrate. The nature of the FX hairpins with the high frequency of single mismatches may account for the ability of MutS $\alpha$  to bind to and coordinate their repair. The ability of MutS $\alpha$  to contribute both to error-free repair and to expansions may reflect MutS $\alpha$ 's ability to participate in more than one DNA repair pathway [50, 51].

We have recently demonstrated that a hypomorphic mutation in Pol $\beta$ , a key DNA polymerase involved in base excision repair (BER), reduces expansion in the FXD mouse [52]. How MutS $\alpha$  and MutS $\beta$  interface with the BER pathway to generate expansions in these models remains an open question. One possibility is that MutS $\beta$  and MutS $\alpha$  act downstream of DNA damage excision to stabilize loop-outs formed during strand-slippage and strand-displacement synthesis that is mediated at least in part by Pol $\beta$ . We speculate that normal signaling by MutS $\alpha$  results in MMR of these loop-outs resulting in error-free repair, while MutS $\beta$ , alone or together with MutS $\alpha$ , can channel them into a different repair pathway that results in expansions.

## Materials and Methods

### Ethics statement

This work was carried according to ARAC guidelines and procedures as outlined in the Guide for the Care and Use of Laboratory Animals, U.S. Government Principles for the Utilization and Care of Vertebrate Animals Used in Testing, Research, and Training and Public Health Service Policy on Humane Care and Use of Laboratory Animals. This work was approved by the NIDDK Animal Care and Use Committee (ASP: K021-LMCB-12 and K021-LMCB-15).

### Oligonucleotides and proteins

Oligonucleotides were obtained from Integrated DNA technologies (IDT, Coralville IA) and are listed in Table 2. Purified human MutS $\alpha$  was a kind gift of Drs Hsieh and Geng (NIDDK, NIH). Purified human MutS $\beta$  was a kind gift of Drs Yang and Li (NIDDK, NIH). This MutS $\beta$  complex contained a “trimmed” version of MSH3 containing amino acids 211–1125. This MutS $\beta$  complex has the same binding affinities for homoduplexes, tailed substrates and IDLs as complexes containing the full length MSH3 protein, as well as the same rate constants and ATPase activities [30].

### Mouse maintenance

The generation of the FXD mice was described previously [2]. These mice are on a C57BL/6 background. The *Msh6*<sup>+/-</sup> mice were generated previously [49, 53] and cryopreserved embryos were obtained from the NCI Mouse Repository (Frederick, MD). These mice are also on a predominantly C57BL/6 background. Live born pups were generated from these embryos by implantation into the oviduct of pseudopregnant recipients using standard procedures. F2 *Msh6*<sup>+/-</sup> parents were bred to generate *Msh6*<sup>+/+</sup>, *Msh6*<sup>+/-</sup> and *Msh6*<sup>-/-</sup> littermates. Multiple breeding pairs from the same parents were set up for each genotype. The litters for each genotype considered for this analysis had a similar parental age distribution. This was the same



genetic background and breeding strategy that we had used previously to examine the effect of the loss of MSH3 on the expansion frequency [14]. Mice were maintained in accordance with the guidelines of the NIDDK Animal Care and Use Committee and with the *Guide for the Care and Use of Laboratory Animals* (NIH publication no. 85–23, revised 1996).

## Genotyping and analysis of repeat number

Sperm was isolated from the cauda epididymis as previously described [54], pelleted twice by centrifugation at 500 g for 5 min and the pellet resuspended first in PBS and then in 100  $\mu$ l of a solution containing a 90:10 mixture of ATL lysis buffer (Qiagen, Valencia, CA) and a 20 mg/ml proteinase K solution (Invitrogen, Carlsbad, CA). The samples were then incubated at 55°C overnight before the addition of 30  $\mu$ l of 5 M NaCl. The resultant precipitate was pelleted by centrifugation and the supernatant transferred to a new tube and mixed with 130  $\mu$ l of ethanol. The DNA was then pelleted by centrifugation and dissolved in TE by incubation overnight at 55°C. This protocol results in little, if any, contamination with somatic DNA [54]. Genomic DNA from mouse tails was extracted using KAPA Mouse Genotyping Kit (KAPA Biosystems, Wilmington, MA). Genomic DNA from other tissues was extracted using a Maxwell16 Mouse tail DNA purification kit (Promega, Madison, WI) according to the manufacturer's instructions. *Msh6* genotyping was carried out with Taq DNA polymerase in standard buffer with either the M010/M011 primer pair to detect the WT allele and M012/M013 to detect the mutant allele. The PCR parameters were 1x 94°C for 1 min., 35x (94°C for 1 min., 60°C for 2 min. and 72°C for 1 min), followed by 1x 72°C for 3 min. The presence of the PM allele and its repeat number was determined using a fluorescent PCR assay and FraxM4 and FraxM5 primer pair as described previously [3]. The somatic instability index (SII) was calculated from the GeneMapper profiles of DNA from different organs as previously described [3, 22] and used to evaluate the extent of somatic expansion in adult mice. For small pool PCR analysis from sperm, the DNA was diluted to 3 pg/ $\mu$ l (roughly 1 haploid genome equivalent/ $\mu$ l). The diluted DNA was then subjected to nested PCR. The first round of PCR was carried out using the primers FraxC and FraxF in a 25  $\mu$ l PCR mix as described previously [55]. One microliter of this PCR mix was used in second round of PCR with the FraxM4 and FraxM5 primers. Roughly 50% of the reactions contained a PCR product, consistent with the idea that each positive PCR likely represents the products of amplification of DNA from a single sperm cell. An exact Jonckheere-Terpstra test of trend in ordered counts was carried out using StatXact software (version 8; Cambridge, Massachusetts). Fisher's exact test was carried out using the GraphPad QuickCalcs website (<http://www.graphpad.com/quickcalcs>). The Mann-Whitney *U* test was carried out using VassarStats (<http://vassarstats.net/>). We set the significance level ( $\alpha$ ) at 0.050 for the pairwise comparisons. For the comparisons of WT, heterozygous and homozygous null animals this corresponds to  $p = 0.015$  after adjusting for multiple testing using the (relatively conservative) Bonferroni correction. Hartigans' dip test was calculated using the dip. test command in the R diptest library.

## Western blotting

Total protein extracts were prepared from flash frozen brain, liver, testes and ovary of 6-month old mice. Tissues were homogenized using a tissue homogenizer (Precellys 24, Bertin Technologies, Berlin, Germany) with T-PER protein extraction reagent (Pierce Biotechnology, Inc, Rockford, IL) supplemented with complete, Mini, EDTA-free protease inhibitor cocktail (Roche Applied Science, Indianapolis, IN). Nuclear extracts of liver proteins were prepared using the NE-PER Nuclear and cytoplasmic extraction reagents (Pierce Biotechnology, Inc, Rockford, IL) according to the manufacturer's instructions. The protein concentrations were

determined using a Bio-Rad protein assay kit (Bio-Rad, Hercules, CA). Proteins were heated for 10 minutes at 70°C in LDS-Sample Buffer (Life Technologies, Grand Island, NY), resolved by electrophoresis on either 3–8% NuPAGE Novex Tris-Acetate gels (Life Technologies) or 4–12% NuPAGE Novex Tris-Bis gels (Life Technologies) and transferred to nitrocellulose membranes using the iBlot transfer apparatus (Life Technologies) according to the manufacturer's instructions. Membranes were blocked for one hour at room temperature in 5% ECL Prime blocking agent (GE Healthcare Bio-Sciences) in TBST, then incubated overnight at 4°C with antibodies to MSH2 (ab70270, Abcam, Cambridge, MA) at a concentration of (1:10000), MSH3 (sc-271079, Santa Cruz, Dallas, TX) at a concentration of (1:1000) and MSH6 (BD 610918, BD Biosciences, Franklin Lakes, NJ) at a concentration of (1:1000). The secondary antibodies (anti-mouse IgG, NA931V and anti-rabbit IgG, NA934V, GE Healthcare Bio-Sciences) were both used at a dilution of 1:5000. After addition of the ECL Prime detection reagent (GE Healthcare Bio-Sciences), the blot was imaged using a Fluorchem M imaging system (Proteinsimple, Santa Clara, CA). Beta-actin (anti-mouse ab8227, Abcam, Cambridge, MA) was used as a loading control for total cell extracts and lamin B (ab16048, Abcam, Cambridge, MA) for nuclear extracts. A representative example of a full blot of testes protein extracts showing binding to MSH2, MSH3, MSH6 and the loading control  $\beta$ -actin is shown in [S1 Fig](#). Western blots were repeated several times and always included molecular weight markers and extracts from the appropriate null mice as negative controls. To evaluate whether the loss of MSH6 affected the levels of MSH3 in *Msh6*<sup>-/-</sup> mice, knowledge of the absolute levels of each protein is not necessary. Since the levels of MSH3 in each group of animals was tested with equivalent amounts of protein using the same antibody on the same gel, the avidity of the MSH3 antibody relative to the avidity of the MSH6 or MSH2 antibodies is not an issue. We thus were able to directly compare the levels of MSH3 in WT, *Msh3*<sup>-/-</sup> and *Msh6*<sup>-/-</sup> animals by determining the amount of each protein relative to  $\beta$ -actin (total protein extracts) or lamin B1 (nuclear extracts) using the AlphaView software for FluorChem Systems (Proteinsimple, Santa Clara, CA). The levels of MSH2 and MSH6 in these animals were determined in the same way.

### EMSA analysis of MutS $\alpha$ binding to the CGG- and CCG- loop-outs

The oligonucleotides used in EMSA were prepared as described previously [14]. The binding reactions were carried out using the Gelshift chemiluminescent EMSA kit (Active Motif, Carlsbad, CA) according to the manufacturer's instructions using the indicated amounts of purified human MutS $\alpha$  and human MutS $\beta$  and 2 fmoles of the duplexed oligonucleotides as described previously [14].

### Thermal analysis of the CCG-repeats in the presence of MutS $\alpha$

The oligonucleotide used for thermal analysis consisted of a single strand of DNA comprised of 10 copies of CCG with the 5' end labeled with 5-carboxy-X-rhodamine (ROX) and the 3' end with IOWA Black RQ. The oligonucleotide was prepared as described previously [14] and MutS $\alpha$  or BSA was added to 360 nM as indicated. Thermal denaturation was monitored as described previously [14]. The melting curve was consistent with a two-state model ([S3 Fig](#)) and the thermodynamic parameters were thus derived from the melting curve using a two-state model (closed and open states).

## Supporting Information

**S1 Fig. Representative western blot showing simultaneous reaction of protein extracts from WT, *Msh3*<sup>-/-</sup> and *Msh6*<sup>-/-</sup> mouse testes with antibodies to MSH2, MSH3 and MSH6.** Three different animals of each genotype are shown. The *Msh2*<sup>-/-</sup> sample represents the same amount of protein derived from pooling testes extracts from 3 different males. This sample

serves as a negative control for the 3 antibodies since these mice lack MSH2, MSH3 and MSH6. The normalization control,  $\beta$ -actin is also shown on the same blot. A much lower exposure of this gel was used for the  $\beta$ -actin quantitation. The bands indicated by the asterisk represent non-specific products resulting from the use of the MSH3 mouse monoclonal antibody. (TIFF)

**S2 Fig. MutS $\alpha$  and MutS $\beta$  binding to canonical and noncanonical substrates.** A) Quantitation of MutS $\alpha$  and MutS $\beta$ . Equimolar amounts of MutS $\alpha$  and MutS $\beta$  based on protein concentration were resolved by SDS-PAGE. The resolved proteins were transferred to nitrocellulose membrane and challenged with antibodies to MSH2, MSH3 and MSH6. The similarity in the intensity of the MSH2-reacting products in the MutS $\alpha$  and MutS $\beta$  lanes confirms that they contain very similar amounts of MSH2 and thus comparable concentrations of protein reflect comparable levels of MutS $\alpha$  and MutS $\beta$ . B) and C) Different amounts of MutS $\alpha$  and MutS $\beta$  were added to reaction mixtures containing either a fully homoduplex molecule or otherwise duplex oligonucleotides containing the indicated mismatched or IDL substrates as described in the Materials and Methods. For the G•T substrate 0.8, 4 and 20 nM of each protein was used. For the remaining substrates 0.16, 0.8, 4, and 20 nM of each protein was used. The DNA and DNA:MutS complexes were then resolved by native polyacrylamide gel electrophoresis at 4°C, transferred to nylon membrane and the DNA detected using streptavidin conjugated to horseradish peroxidase (HRP) and a chemiluminescent substrate. Note that the same molar concentration of substrate and similar exposures were used throughout. The higher signal coming from the free probe in panel B, may reflect the fact that these substrates are smaller than the substrates shown in panel C, and thus may be transferred more efficiently to the nylon membrane. However, since the free probes used in panel C are all the same size, it is possible to compare the extent of binding to the substrates for the different repeat-containing probes. D) (CGG)<sub>13</sub> and (CCG)<sub>13</sub> were incubated with MutS $\beta$  along with the indicated amounts of BSA. (TIFF)

**S3 Fig. Melting of the CCG-repeat in the presence of MutS $\alpha$  fits a two-state model.** A and B). Melting curves produced on thermal denaturation of a (CCG)<sub>10</sub> oligonucleotide labeled at the 5' end with ROX and at the 3' end with IOWA Black RQ. The intensity of fluorescence of the ROX donor was plotted against temperature in the presence of BSA (A) or MutS $\alpha$ . Dots represent the experimental data and solid lines are the best-fits according to the two-state model. The panels on the right show the distribution of residuals. (TIFF)

## Acknowledgments

The Usdin lab would like to acknowledge all the hard work by the people in the NIDDK mouse facility that take care of the mice used in this study. Without their help, this work would not have been possible. We would also like to thank Kenneth Wilkins (NIDDK) for his input on the statistical analysis.

## Author Contributions

Conceived and designed the experiments: XNZ RL IG KU. Performed the experiments: RL XNZ KA IG. Analyzed the data: XNZ RL DW KU. Wrote the paper: XNZ RL IG KU.

## References

1. Loesch D, Hagerman R. Unstable mutations in the FMR1 gene and the phenotypes. *Adv Exp Med Biol.* 2012; 769:78–114. PMID: [23560306](#); PubMed Central PMCID: [PMC4124039](#).



2. Entezam A, Biacsi R, Orrison B, Saha T, Hoffman GE, Grabczyk E, et al. Regional FMRP deficits and large repeat expansions into the full mutation range in a new Fragile X premutation mouse model. *Gene*. 2007; 395(1–2):125–34. Epub 2007/04/20. doi: [10.1016/j.gene.2007.02.026](https://doi.org/10.1016/j.gene.2007.02.026) PMID: [17442505](https://pubmed.ncbi.nlm.nih.gov/17442505/); PubMed Central PMCID: PMC1950257.
3. Lokanga RA, Entezam A, Kumari D, Yudkin D, Qin M, Smith CB, et al. Somatic expansion in mouse and human carriers of fragile X premutation alleles. *Hum Mutat*. 2013; 34(1):157–66. Epub 2012/08/14. doi: [10.1002/humu.22177](https://doi.org/10.1002/humu.22177) PMID: [22887750](https://pubmed.ncbi.nlm.nih.gov/22887750/); PubMed Central PMCID: PMC3524353.
4. Zhao XN, Usdin K. Gender and cell-type-specific effects of the transcription-coupled repair protein, ERCC6/CSB, on repeat expansion in a mouse model of the fragile X-related disorders. *Hum Mutat*. 2014; 35(3):341–9. doi: [10.1002/humu.22495](https://doi.org/10.1002/humu.22495) PMID: [24352881](https://pubmed.ncbi.nlm.nih.gov/24352881/); PubMed Central PMCID: PMC4067466.
5. Chen X, Mariappan SV, Catasti P, Ratliff R, Moyzis RK, Laayoun A, et al. Hairpins are formed by the single DNA strands of the fragile X triplet repeats: structure and biological implications. *Proc Natl Acad Sci U S A*. 1995; 92(11):5199–203. Epub 1995/05/23. PMID: [7761473](https://pubmed.ncbi.nlm.nih.gov/7761473/); PubMed Central PMCID: PMC41876.
6. Kettani A, Kumar RA, Patel DJ. Solution structure of a DNA quadruplex containing the fragile X syndrome triplet repeat. *J Mol Biol*. 1995; 254(4):638–56. Epub 1995/12/08. PMID: [7500339](https://pubmed.ncbi.nlm.nih.gov/7500339/).
7. Mitas M, Yu A, Dill J, Haworth IS. The trinucleotide repeat sequence d(CGG)<sub>15</sub> forms a heat-stable hairpin containing Gsyn. Ganti base pairs. *Biochemistry*. 1995; 34(39):12803–11. Epub 1995/10/03. PMID: [7548035](https://pubmed.ncbi.nlm.nih.gov/7548035/).
8. Nadel Y, Weisman-Shomer P, Fry M. The fragile X syndrome single strand d(CGG)<sub>n</sub> nucleotide repeats readily fold back to form unimolecular hairpin structures. *J Biol Chem*. 1995; 270(48):28970–7. Epub 1995/12/01. PMID: [7499428](https://pubmed.ncbi.nlm.nih.gov/7499428/).
9. Mariappan SV, Catasti P, Chen X, Ratliff R, Moyzis RK, Bradbury EM, et al. Solution structures of the individual single strands of the fragile X DNA triplets (GCC)<sub>n</sub>(GGC)<sub>n</sub>. *Nucleic Acids Res*. 1996; 24(4):784–92. Epub 1996/02/15. PMID: [8604324](https://pubmed.ncbi.nlm.nih.gov/8604324/); PubMed Central PMCID: PMC145702.
10. Yu A, Barron MD, Romero RM, Christy M, Gold B, Dai J, et al. At physiological pH, d(CCG)<sub>15</sub> forms a hairpin containing protonated cytosines and a distorted helix. *Biochemistry*. 1997; 36(12):3687–99. Epub 1997/03/25. doi: [10.1021/bi9625410](https://doi.org/10.1021/bi9625410) PMID: [9132022](https://pubmed.ncbi.nlm.nih.gov/9132022/).
11. Fojtik P, Vorlickova M. The fragile X chromosome (GCC) repeat folds into a DNA tetraplex at neutral pH. *Nucleic Acids Res*. 2001; 29(22):4684–90. Epub 2001/11/20. PMID: [11713318](https://pubmed.ncbi.nlm.nih.gov/11713318/); PubMed Central PMCID: PMC92515.
12. Usdin K, Woodford KJ. CGG repeats associated with DNA instability and chromosome fragility form structures that block DNA synthesis in vitro. *Nucleic Acids Res*. 1995; 23(20):4202–9. Epub 1995/10/25. 5j0289 [pii]. PMID: [7479085](https://pubmed.ncbi.nlm.nih.gov/7479085/); PubMed Central PMCID: PMC307363.
13. Zhao XN, Usdin K. The Repeat Expansion Diseases: The dark side of DNA repair. *DNA Repair (Amst)*. 2015; 32:96–105. doi: [10.1016/j.dnarep.2015.04.019](https://doi.org/10.1016/j.dnarep.2015.04.019) PMID: [26002199](https://pubmed.ncbi.nlm.nih.gov/26002199/); PubMed Central PMCID: PMC4522390.
14. Zhao XN, Kumari D, Gupta S, Wu D, Evanitsky M, Yang W, et al. MutSbeta generates both expansions and contractions in a mouse model of the Fragile X-associated Disorders. *Hum Mol Genet*. 2015; In Press.
15. Zhao XN, Usdin K. The transcription-coupled repair protein ERCC6/CSB also protects against repeat expansion in a mouse model of the fragile X premutation. *Hum Mutat*. 2015; 36(4):482–7. Epub 2015/03/03. doi: [10.1002/humu.22777](https://doi.org/10.1002/humu.22777) PMID: [25726753](https://pubmed.ncbi.nlm.nih.gov/25726753/); PubMed Central PMCID: PMC4382389.
16. Foiry L, Dong L, Savouret C, Hubert L, te Riele H, Junien C, et al. Msh3 is a limiting factor in the formation of intergenerational CTG expansions in DM1 transgenic mice. *Hum Genet*. 2006; 119(5):520–6. doi: [10.1007/s00439-006-0164-7](https://doi.org/10.1007/s00439-006-0164-7) PMID: [16552576](https://pubmed.ncbi.nlm.nih.gov/16552576/).
17. Ezzatizadeh V, Pinto RM, Sandi C, Sandi M, Al-Mahdawi S, Te Riele H, et al. The mismatch repair system protects against intergenerational GAA repeat instability in a Friedreich ataxia mouse model. *Neurobiol Dis*. 2012; 46(1):165–71. Epub 2012/02/01. doi: [10.1016/j.nbd.2012.01.002](https://doi.org/10.1016/j.nbd.2012.01.002) PMID: [22289650](https://pubmed.ncbi.nlm.nih.gov/22289650/); PubMed Central PMCID: PMC3556645.
18. Dragileva E, Hendricks A, Teed A, Gillis T, Lopez ET, Friedberg EC, et al. Intergenerational and striatal CAG repeat instability in Huntington's disease knock-in mice involve different DNA repair genes. *Neurobiol Dis*. 2009; 33(1):37–47. Epub 2008/10/22. doi: [10.1016/j.nbd.2008.09.014](https://doi.org/10.1016/j.nbd.2008.09.014) PMID: [18930147](https://pubmed.ncbi.nlm.nih.gov/18930147/); PubMed Central PMCID: PMC2811282.
19. van den Broek WJ, Nelen MR, Wansink DG, Coerwinkel MM, te Riele H, Groenen PJ, et al. Somatic expansion behaviour of the (CTG)<sub>n</sub> repeat in myotonic dystrophy knock-in mice is differentially affected by Msh3 and Msh6 mismatch-repair proteins. *Hum Mol Genet*. 2002; 11(2):191–8. PMID: [11809728](https://pubmed.ncbi.nlm.nih.gov/11809728/).
20. Du J, Campau E, Soragni E, Ku S, Puckett JW, Dervan PB, et al. Role of mismatch repair enzymes in GAA.TTC triplet-repeat expansion in Friedreich ataxia induced pluripotent stem cells. *J Biol Chem*.

- 2012; 287(35):29861–72. Epub 2012/07/17. doi: [10.1074/jbc.M112.391961](https://doi.org/10.1074/jbc.M112.391961) PMID: [22798143](https://pubmed.ncbi.nlm.nih.gov/22798143/); PubMed Central PMCID: PMC3436184.
21. Lokanga RA, Zhao XN, Entezam A, Usdin K. X inactivation plays a major role in the gender bias in somatic expansion in a mouse model of the fragile X-related disorders: implications for the mechanism of repeat expansion. *Hum Mol Genet.* 2014; 23(18):4985–94. doi: [10.1093/hmg/ddu213](https://doi.org/10.1093/hmg/ddu213) PMID: [WOS:000343184400019](https://pubmed.ncbi.nlm.nih.gov/24400019/).
  22. Lee JM, Zhang J, Su AI, Walker JR, Wiltshire T, Kang K, et al. A novel approach to investigate tissue-specific trinucleotide repeat instability. *BMC Syst Biol.* 2010; 4:29. Epub 2010/03/23. doi: [10.1186/1752-0509-4-29](https://doi.org/10.1186/1752-0509-4-29) PMID: [20302627](https://pubmed.ncbi.nlm.nih.gov/20302627/); PubMed Central PMCID: PMC2856555.
  23. Lokanga RA, Zhao XN, Usdin K. The mismatch repair protein MSH2 is rate limiting for repeat expansion in a fragile X premutation mouse model. *Hum Mutat.* 2014; 35(1):129–36. doi: [10.1002/humu.22464](https://doi.org/10.1002/humu.22464) PMID: [24130133](https://pubmed.ncbi.nlm.nih.gov/24130133/); PubMed Central PMCID: PMC3951054.
  24. Drummond JT, Genschel J, Wolf E, Modrich P. DHFR/MSH3 amplification in methotrexate-resistant cells alters the hMutSalpha/hMutSbeta ratio and reduces the efficiency of base-base mismatch repair. *Proc Natl Acad Sci U S A.* 1997; 94(19):10144–9. Epub 1997/09/18. PMID: [9294177](https://pubmed.ncbi.nlm.nih.gov/9294177/); PubMed Central PMCID: PMC23329.
  25. Marra G, Iaccarino I, Lettieri T, Roscilli G, Delmastro P, Jiricny J. Mismatch repair deficiency associated with overexpression of the MSH3 gene. *Proc Natl Acad Sci U S A.* 1998; 95(15):8568–73. Epub 1998/07/22. PMID: [9671718](https://pubmed.ncbi.nlm.nih.gov/9671718/); PubMed Central PMCID: PMC21116.
  26. Genschel J, Littman SJ, Drummond JT, Modrich P. Isolation of MutSbeta from human cells and comparison of the mismatch repair specificities of MutSbeta and MutSalpha. *J Biol Chem.* 1998; 273(31):19895–901. Epub 1998/07/25. PMID: [9677427](https://pubmed.ncbi.nlm.nih.gov/9677427/).
  27. Chang DK, Ricciardiello L, Goel A, Chang CL, Boland CR. Steady-state regulation of the human DNA mismatch repair system. *J Biol Chem.* 2000; 275(24):18424–31. Epub 2000/04/05. doi: [10.1074/jbc.M001140200](https://doi.org/10.1074/jbc.M001140200) [pii]. PMID: [10747992](https://pubmed.ncbi.nlm.nih.gov/10747992/).
  28. Tomé S, Manley K, Simard JP, Clark GW, Slean MM, Swami M, et al. MSH3 polymorphisms and protein levels affect CAG repeat instability in Huntington's disease mice. *PLoS Genet.* 2013; 9(2):e1003280. Epub 2013/03/08. doi: [10.1371/journal.pgen.1003280](https://doi.org/10.1371/journal.pgen.1003280) PMID: [23468640](https://pubmed.ncbi.nlm.nih.gov/23468640/); PubMed Central PMCID: PMC3585117.
  29. Iaccarino I, Marra G, Palombo F, Jiricny J. hMSH2 and hMSH6 play distinct roles in mismatch binding and contribute differently to the ATPase activity of hMutSalpha. *EMBO J.* 1998; 17(9):2677–86. doi: [10.1093/emboj/17.9.2677](https://doi.org/10.1093/emboj/17.9.2677) PMID: [9564049](https://pubmed.ncbi.nlm.nih.gov/9564049/); PubMed Central PMCID: PMC1170608.
  30. Gupta S, Gellert M, Yang W. Mechanism of mismatch recognition revealed by human MutSbeta bound to unpaired DNA loops. *Nat Struct Mol Biol.* 2012; 19(1):72–8. Epub 2011/12/20. doi: [10.1038/nsmb.2175](https://doi.org/10.1038/nsmb.2175) PMID: [22179786](https://pubmed.ncbi.nlm.nih.gov/22179786/); PubMed Central PMCID: PMC3252464.
  31. Owen BA, Yang Z, Lai M, Gajec M, Badger JD 2nd, Hayes JJ, et al. (CAG)(n)-hairpin DNA binds to Msh2-Msh3 and changes properties of mismatch recognition. *Nat Struct Mol Biol.* 2005; 12(8):663–70. Epub 2005/07/19. doi: [10.1038/nsmb965](https://doi.org/10.1038/nsmb965) PMID: [16025128](https://pubmed.ncbi.nlm.nih.gov/16025128/).
  32. Tseng Q, Orans J, Hast MA, Iyer RR, Changela A, Modrich PL, et al. Purification, crystallization and preliminary X-ray diffraction analysis of the human mismatch repair protein MutSbeta. *Acta Crystallogr Sect F Struct Biol Cryst Commun.* 2011; 67(Pt 8):947–52. doi: [10.1107/S1744309111019300](https://doi.org/10.1107/S1744309111019300) PMID: [21821902](https://pubmed.ncbi.nlm.nih.gov/21821902/); PubMed Central PMCID: PMC3151135.
  33. Fishel R, Ewel A, Lescoe MK. Purified human MSH2 protein binds to DNA containing mismatched nucleotides. *Cancer Res.* 1994; 54(21):5539–42. PMID: [7923193](https://pubmed.ncbi.nlm.nih.gov/7923193/).
  34. Surtees JA, Alani E. Mismatch repair factor MSH2-MSH3 binds and alters the conformation of branched DNA structures predicted to form during genetic recombination. *J Mol Biol.* 2006; 360(3):523–36. Epub 2006/06/20. doi: [10.1016/j.jmb.2006.05.032](https://doi.org/10.1016/j.jmb.2006.05.032) PMID: [16781730](https://pubmed.ncbi.nlm.nih.gov/16781730/).
  35. Lee SD, Surtees JA, Alani E. *Saccharomyces cerevisiae* MSH2-MSH3 and MSH2-MSH6 complexes display distinct requirements for DNA binding domain I in mismatch recognition. *J Mol Biol.* 2007; 366(1):53–66. doi: [10.1016/j.jmb.2006.10.099](https://doi.org/10.1016/j.jmb.2006.10.099) PMID: [17157869](https://pubmed.ncbi.nlm.nih.gov/17157869/); PubMed Central PMCID: PMC1805781.
  36. Tian L, Gu L, Li GM. Distinct nucleotide binding/hydrolysis properties and molar ratio of MutSalpha and MutSbeta determine their differential mismatch binding activities. *J Biol Chem.* 2009; 284(17):11557–62. doi: [10.1074/jbc.M900908200](https://doi.org/10.1074/jbc.M900908200) PMID: [19228687](https://pubmed.ncbi.nlm.nih.gov/19228687/); PubMed Central PMCID: PMC2670160.
  37. Wilson T, Guerrette S, Fishel R. Dissociation of mismatch recognition and ATPase activity by hMSH2-hMSH3. *J Biol Chem.* 1999; 274(31):21659–64. PMID: [10419475](https://pubmed.ncbi.nlm.nih.gov/10419475/).
  38. Mitas M, Yu A, Dill J, Kamp TJ, Chambers EJ, Haworth IS. Hairpin properties of single-stranded DNA containing a GC-rich triplet repeat: (CTG)<sub>15</sub>. *Nucleic Acids Res.* 1995; 23(6):1050–9. Epub 1995/03/25. doi: [7731793](https://pubmed.ncbi.nlm.nih.gov/7731793/) [pii]. PMID: [7731793](https://pubmed.ncbi.nlm.nih.gov/7731793/); PubMed Central PMCID: PMC306804.

39. Yu A, Dill J, Mitas M. The purine-rich trinucleotide repeat sequences d(CAG)<sub>15</sub> and d(GAC)<sub>15</sub> form hairpins. *Nucleic Acids Res.* 1995; 23(20):4055–7. Epub 1995/10/25. 5s0430 [pii]. PMID: [7479064](#); PubMed Central PMCID: PMC307342.
40. Amrane S, Mergny JL. Length and pH-dependent energetics of (CCG)<sub>n</sub> and (CGG)<sub>n</sub> trinucleotide repeats. *Biochimie.* 2006; 88(9):1125–34. Epub 2006/05/13. doi: [10.1016/j.biochi.2006.03.007](#) PMID: [16690198](#).
41. Gacy AM, Goellner G, Juranic N, Macura S, McMurray CT. Trinucleotide Repeats That Expand in Human-Disease Form Hairpin Structures in-Vitro. *Cell.* 1995; 81(4):533–40. PMID: [WOS: A1995QZ71000010](#).
42. Kovtun IV, Goellner G, McMurray CT. Structural features of trinucleotide repeats associated with DNA expansion. *Biochem Cell Biol.* 2001; 79(3):325–36. PMID: [11467746](#).
43. Raschle M, Marra G, Nystrom-Lahti M, Schar P, Jiricny J. Identification of hMutLbeta, a heterodimer of hMLH1 and hPMS1. *J Biol Chem.* 1999; 274(45):32368–75. Epub 1999/11/05. PMID: [10542278](#).
44. Modrich P. Strand-specific mismatch repair in mammalian cells. *J Biol Chem.* 1997; 272(40):24727–30. Epub 1997/10/06. PMID: [9312062](#).
45. Tseng-Rogenski SS, Chung H, Wilk MB, Zhang S, Iwaizumi M, Carethers JM. Oxidative stress induces nuclear-to-cytosol shift of hMSH3, a potential mechanism for EMAS in colorectal cancer cells. *PLoS One.* 2012; 7(11):e50616. doi: [10.1371/journal.pone.0050616](#) PMID: [23226332](#); PubMed Central PMCID: PMC3511561.
46. Carethers JM, Koi M, Tseng-Rogenski SS. EMAS is a Form of Microsatellite Instability That is Initiated by Inflammation and Modulates Colorectal Cancer Progression. *Genes (Basel).* 2015; 6(2):185–205. doi: [10.3390/genes6020185](#) PMID: [25836926](#); PubMed Central PMCID: PMC4488660.
47. Ohzeki S, Tachibana A, Tatsumi K, Kato T. Spectra of spontaneous mutations at the hprt locus in colorectal carcinoma cell lines defective in mismatch repair. *Carcinogenesis.* 1997; 18(6):1127–33. PMID: [9214593](#).
48. Yang G, Scherer SJ, Shell SS, Yang K, Kim M, Lipkin M, et al. Dominant effects of an Msh6 missense mutation on DNA repair and cancer susceptibility. *Cancer Cell.* 2004; 6(2):139–50. Epub 2004/08/25. doi: [10.1016/j.ccr.2004.06.024](#) PMID: [15324697](#).
49. Edelmann W, Yang K, Umar A, Heyer J, Lau K, Fan K, et al. Mutation in the mismatch repair gene Msh6 causes cancer susceptibility. *Cell.* 1997; 91(4):467–77. Epub 1997/12/09. PMID: [9390556](#).
50. Sawant A, Kothandapani A, Zhitkovich A, Sobol RW, Patrick SM. Role of mismatch repair proteins in the processing of cisplatin interstrand cross-links. *DNA Repair (Amst).* 2015; 35:126–36. doi: [10.1016/j.dnarep.2015.10.003](#) PMID: [26519826](#); PubMed Central PMCID: PMC4651805.
51. Hong Z, Jiang J, Hashiguchi K, Hoshi M, Lan L, Yasui A. Recruitment of mismatch repair proteins to the site of DNA damage in human cells. *J Cell Sci.* 2008; 121(Pt 19):3146–54. Epub 2008/09/04. jcs.026393 [pii] doi: [10.1242/jcs.026393](#) PMID: [18765568](#).
52. Lokanga RA, Senejani AG, Sweasy JB, Usdin K. Heterozygosity for a hypomorphic polbeta mutation reduces the expansion frequency in a mouse model of the fragile x-related disorders. *PLoS Genet.* 2015; 11(4):e1005181. Epub 2015/04/18. doi: [10.1371/journal.pgen.1005181](#) PMID: [25886163](#); PubMed Central PMCID: PMC4401650.
53. Edelmann W, Umar A, Yang K, Heyer J, Kucherlapati M, Lia M, et al. The DNA mismatch repair genes Msh3 and Msh6 cooperate in intestinal tumor suppression. *Cancer Res.* 2000; 60(4):803–7. Epub 2000/03/08. PMID: [10706084](#).
54. Lambrot R, Xu C, Saint-Phar S, Chountalos G, Cohen T, Paquet M, et al. Low paternal dietary folate alters the mouse sperm epigenome and is associated with negative pregnancy outcomes. *Nat Commun.* 2013; 4:2889. doi: [10.1038/ncomms3889](#) PMID: [24326934](#); PubMed Central PMCID: PMC3863903.
55. Lavedan C, Grabczyk E, Usdin K, Nussbaum RL. Long uninterrupted CGG repeats within the first exon of the human FMR1 gene are not intrinsically unstable in transgenic mice. *Genomics.* 1998; 50(2):229–40. Epub 1998/07/08. S0888-7543(98)95299-5 [pii] doi: [10.1006/geno.1998.5299](#) PMID: [9653650](#).
